# Supplementary material for: Genomic Alterations in Circulating Tumor DNA from Diverse Cancer Patients Identified by Next-Generation Sequencing
Source: Oxford University Press journal article supplement (doi:10.1158/0008-5472.can-17-0885), 2017-08-14
Supplement: 00085472can170885-sup-180998_2_supp_4177156_7tkx6c.docx [file 00085472can170885-sup-180998_2_supp_4177156_7tkx6c.docx]

**Supplementary Table 4. List of potentially actionable alterations per patient**

| **Patient #** | **Type of cancer** | **Potentially actionable alterations** | **N of potentially actionable alterations** | **≥ 1 alteration targetable by FDA-approved drug** | **Only clinical trials available** |
| --- | --- | --- | --- | --- | --- |
| 1 | Lung | EGFR amp, TP53 E258K | 2 | YES | NO |
| 2 | Breast | EGFR amp | 1 | YES | NO |
| 3 | Lung | EGFR L858R, EGFR S768I | 2 | YES | NO |
| 4 | Breast | ERBB2 amp, PIK3CA E545K | 2 | YES | NO |
| 5 | Breast | TP53 Y126C, TP53 H178P | 2 | NO | YES |
| 6 | Breast | EGFR amp | 1 | YES | NO |
| 7 | Lung | EGFR T790M | 1 | YES | NO |
| 8 | Lung | EGFR L861Q, EGFR G719S, EGFR T790M, TP53 V157F, TP53 R248G | 5 | YES | NO |
| 9 | Genitourinary | AR L702H, ERBB2 amp, MET amp | 3 | YES | NO |
| 10 | Lung | TP53 G266E | 1 | NO | YES |
| 11 | Breast | EGFR amp | 1 | YES | NO |
| 12 | Breast | PIK3CA R108H | 1 | YES | NO |
| 13 | Breast | EGFR amp, MET amp | 2 | YES | NO |
| 14 | Breast | PIK3CA H1047R, TP53 R213L | 2 | YES | NO |
| 15 | Lung | KRAS G12C, TP53 G154V | 2 | YES | NO |
| 16 | Breast | TP53 H178P, TP53 R273C | 2 | NO | YES |
| 17 | Lung | MET amp, TP53 G245C | 2 | YES | NO |
| 18 | Lung | EGFR T790M, EGFR amp, TP53 R306* | 3 | YES | NO |
| 19 | Lung | EGFR amp, EGFR E746K, MET amp | 3 | YES | NO |
| 20 | Breast | MET amp, TP53 E286G | 2 | YES | NO |
| 21 | Lung | EGFR T790M | 1 | YES | NO |
| 22 | Lung | EGFR L858R, ERBB2 S310F, TP53 Y205C | 3 | YES | NO |
| 23 | Breast | TP53 R213* | 1 | NO | YES |
| 24 | Lung | KRAS G13D, TP53 V157F, TP53 Y220H | 3 | YES | NO |
| 25 | Lung | TP53 R248W, TP53 H179Y | 2 | NO | YES |
| 26 | Breast | EGFR amp, PIK3CA E545K, PTEN Q245*, TP53 H179Q | 4 | YES | NO |
| 27 | Lung | EZH2 Y646N, MET amp | 2 | YES | NO |
| 28 | Breast | PIK3CA H1047L | 1 | YES | NO |
| 29 | Other | KRAS G12V, TP53 R273C | 2 | YES | NO |
| 30 | Gynecologic | TP53 V272M | 1 | NO | YES |
| 31 | Brain - CNS | TP53 D281E | 1 | NO | YES |
| 32 | Breast | TP53 C141* | 1 | NO | YES |
| 33 | Lung | KRAS G12C | 1 | YES | NO |
| 34 | Breast | ERBB2 amp | 1 | YES | NO |
| 35 | Breast | BRAF N581S | 1 | YES | NO |
| 36 | Gastrointestinal | TP53 P278T, TP53 I195F, TP53 R249S | 3 | NO | YES |
| 37 | Breast | EGFR amp, MET amp, TP53 R175H | 3 | YES | NO |
| 38 | Lung | TP53 S241F | 1 | NO | YES |
| 39 | Lung | EGFR L858R, TP53 H168R | 2 | YES | NO |
| 40 | Breast | EGFR amp, TP53 V216M | 2 | YES | NO |
| 41 | Genitourinary | EGFR amp, MET amp, RB1 Q62*, TP53 D281N | 4 | YES | NO |
| 42 | Breast | ATM R3008H, PIK3CA E545K, TP53 F270S | 3 | YES | NO |
| 43 | Brain - CNS | JAK2 V617F | 1 | YES | NO |
| 44 | Other | KRAS amp, MET amp, PIK3CA amp | 3 | YES | NO |
| 45 | Brain - CNS | ATM R3008H | 1 | NO | YES |
| 46 | Other | TP53 H179R | 1 | NO | YES |
| 47 | Brain - CNS | BRCA1 Q380* | 1 | YES | NO |
| 48 | Brain - CNS | TP53 R249S | 1 | NO | YES |
| 49 | Brain - CNS | TP53 Q136* | 1 | NO | YES |
| 50 | Brain - CNS | MET amp | 1 | YES | NO |
| 51 | Brain - CNS | TP53 V143M | 1 | NO | YES |
| 52 | Brain - CNS | JAK2 V617F | 1 | YES | NO |
| 53 | Brain - CNS | TP53 Y163C | 1 | NO | YES |
| 54 | Brain - CNS | BRAF Q257R | 1 | YES | NO |
| 55 | Lung | TP53 G245S | 1 | NO | YES |
| 56 | Lung | KRAS G12C, TP53 R248W | 2 | YES | NO |
| 57 | Lung | EGFR L858R, TP53 C135Y | 2 | YES | NO |
| 58 | Brain - CNS | TP53 Y234C | 1 | NO | YES |
| 59 | Brain - CNS | TP53 P152S | 1 | NO | YES |
| 60 | Lung | KRAS G12A, TP53 C275F | 2 | YES | NO |
| 61 | Breast | APC Q901*, RB1 Q504*, TP53 H168P, TP53 S127F | 4 | YES | NO |
| 62 | Genitourinary | TP53 H168R | 1 | NO | YES |
| 63 | Lung | KRAS G12C | 1 | YES | NO |
| 64 | Gastrointestinal | TP53 R249S | 1 | NO | YES |
| 65 | Gastrointestinal | EGFR amp, KRAS G13D, MET amp, TP53 G266R | 4 | YES | NO |
| 66 | Gastrointestinal | CDKN2A G35W, EGFR amp, ERBB2 amp, TP53 Y163C | 4 | YES | NO |
| 67 | Gastrointestinal | FBXW7 R385H, TP53 R213L | 2 | YES | NO |
| 68 | Gastrointestinal | EGFR amp, JAK2 V617F, TP53 Q100*, TP53 V173M, TP53 V216M | 5 | YES | NO |
| 69 | Gastrointestinal | ATM R3008H, TP53 V216M | 2 | NO | YES |
| 70 | Lung | JAK2 V617F, TP53 P190R, TP53 Y163C | 3 | YES | NO |
| 71 | Lung | TP53 Y205C | 1 | NO | YES |
| 72 | Brain - CNS | ATM R3008H | 1 | NO | YES |
| 73 | Gastrointestinal | KRAS G12S | 1 | YES | NO |
| 74 | Lung | NOTCH1 V1599M | 1 | NO | YES |
| 75 | Gastrointestinal | MET amp, TP53 N235D | 2 | YES | NO |
| 76 | Lung | EGFR amp, MET amp | 2 | YES | NO |
| 77 | Genitourinary | HRAS G12S | 1 | YES | NO |
| 78 | Brain - CNS | TP53 C238S | 1 | NO | YES |
| 79 | Lung | BRAF amp, CCNE1 amp, KRAS amp, MAP2K1 C121S, MYC amp, NOTCH1 E1567K, TP53 E298* | 7 | YES | NO |
| 80 | Breast | BRAF amp, ERBB2 amp, FGFR2 amp, MET amp, MYC amp, PIK3CA H1047R, TP53 F134V | 7 | YES | NO |
| 81 | Gastrointestinal | NRAS Q61R, TP53 R282W | 2 | YES | NO |
| 82 | Breast | TP53 Y107* | 1 | NO | YES |
| 83 | Gastrointestinal | KRAS amp | 1 | YES | NO |
| 84 | Gastrointestinal | APC Y935*, BRAF G469A, EGFR amp, EGFR S492R, ERBB2 amp, KRAS Q61H, KRAS amp, KRAS G12A, KRAS G13D, KRAS G12C, NRAS Q61H, NRAS Q61K, PIK3CA amp | 13 | YES | NO |
| 85 | Gastrointestinal | KRAS G12V, KRAS amp | 2 | YES | NO |
| 86 | Gastrointestinal | BRAF amp, ERBB2 amp, FBXW7 R505C, KRAS G13D, PIK3CA E545K, PIK3CA amp, TP53 P278L | 7 | YES | NO |
| 87 | Brain - CNS | TP53 T211A | 1 | NO | YES |
| 88 | Gastrointestinal | ARID1A Q944*, PIK3CA E545K | 2 | YES | NO |
| 89 | Gastrointestinal | KRAS G12V, KRAS amp, MYC A59V, TP53 R248Q | 4 | YES | NO |
| 90 | Gastrointestinal | APC Q1303*, MYC amp, RAF1 amp | 3 | YES | NO |
| 91 | Gynecologic | TP53 K132E | 1 | NO | YES |
| 92 | Lung | KRAS amp, RHOA Y42C, TP53 E294*, TP53 S33Y | 5 | YES | NO |
| 93 | Lung | MAP2K1 K57N, TP53 V203L | 2 | YES | NO |
| 94 | Gastrointestinal | CTNNB1 D32N | 1 | YES | NO |
| 95 | Lung | KRAS G12V | 1 | YES | NO |
| 96 | Gastrointestinal | CDK6 amp, TP53 L257R | 2 | NO | YES |
| 97 | Other | TP53 E198* | 1 | NO | YES |
| 98 | Gastrointestinal | CDKN2A D84N, KRAS G12D | 2 | YES | NO |
| 99 | Lung | CTNNB1 S33C, KRAS G12C | 2 | YES | NO |
| 100 | Gastrointestinal | APC R1450*, BRCA1 C274*, KRAS G13D, TP53 R175H | 4 | YES | NO |
| 101 | Gastrointestinal | KRAS G13D, TP53 P278T | 2 | YES | NO |
| 102 | Gastrointestinal | BRAF amp, CCNE1 amp, CDK6 amp, EGFR amp, TP53 V172F | 5 | YES | NO |
| 103 | Gastrointestinal | APC E422*, TP53 S127F | 2 | YES | NO |
| 104 | Gastrointestinal | CCNE1 amp, FGFR1 amp, KIT amp, MYC amp, PDGFRA amp, PIK3CA amp, TP53 E224* | 7 | YES | NO |
| 105 | Gastrointestinal | TP53 V173M | 1 | NO | YES |
| 106 | Brain - CNS | TP53 L265P | 1 | NO | YES |
| 107 | Gastrointestinal | KRAS G12R | 1 | YES | NO |
| 108 | Gastrointestinal | KRAS G12S, TP53 R248Q | 2 | YES | NO |
| 109 | Gastrointestinal | KRAS G12V, MYC amp, TP53 R248W | 3 | YES | NO |
| 110 | Gastrointestinal | BRAF amp, CDK6 amp, EGFR amp, FGFR1 amp | 4 | YES | NO |
| 111 | Gastrointestinal | KRAS G12D, KRAS amp, MYC amp | 3 | YES | NO |
| 112 | Lung | EGFR E19 del, PIK3CA E545K | 2 | YES | NO |
| 113 | Other | FGFR1 amp, TP53 V143M | 2 | YES | NO |
| 114 | Other | PTEN Q245*, TP53 R282W | 2 | YES | NO |
| 115 | Gastrointestinal | CDK6 amp, EGFR amp, KRAS G12R, SMAD4 R361G | 4 | YES | NO |
| 116 | Gastrointestinal | PIK3CA amp | 1 | YES | NO |
| 117 | Lung | MET amp, TP53 Y163C | 2 | YES | NO |
| 118 | Gastrointestinal | NF1 Q1189*, TP53 C275Y | 2 | YES | NO |
| 119 | Gastrointestinal | KRAS amp, MYC amp, PIK3CA amp, PTEN R130L | 4 | YES | NO |
| 120 | Gastrointestinal | KRAS G12A, SMAD4 R361H | 2 | YES | NO |
| 121 | Gastrointestinal | FGFR1 amp | 1 | YES | NO |
| 122 | Gastrointestinal | PTEN L139*, TP53 R273C | 2 | YES | NO |
| 123 | Gastrointestinal | KRAS amp, TP53 H193R | 2 | YES | NO |
| 124 | Gastrointestinal | TP53 Y163C | 1 | NO | YES |
| 125 | Lung | BRAF amp, EGFR E19 del, EGFR T790M | 3 | YES | NO |
| 126 | Lung | TP53 G245D | 1 | NO | YES |
| 127 | Gastrointestinal | KRAS G13D, TP53 R248W | 2 | YES | NO |
| 128 | Gastrointestinal | KRAS G12R, MYC amp, TP53 P223L | 3 | YES | NO |
| 129 | Lung | EGFR E19 del | 1 | YES | NO |
| 130 | Gastrointestinal | TP53 R196P | 1 | NO | YES |
| 131 | Gastrointestinal | APC R1114*, KRAS G12V, PIK3CA E545K, TP53 M246V | 4 | YES | NO |
| 132 | Gastrointestinal | CTNNB1 S33C, TP53 R175H | 2 | YES | NO |
| 133 | Brain - CNS | TP53 Y220C, TP53 P152L | 2 | NO | YES |
| 134 | Lung | TP53 V143M | 1 | NO | YES |
| 135 | Breast | ESR1 Y537S, ESR1 D538G, ESR1 Y537N, KRAS amp, PIK3CA H1047R, PIK3CA amp | 6 | YES | NO |
| 136 | Gastrointestinal | BRAF amp, KRAS G12V, SMAD4 R361C, TP53 R273C | 4 | YES | NO |
| 137 | Lung | KIT amp, PDGFRA amp, PIK3CA amp, TP53 E271K, TP53 H179Q | 5 | YES | NO |
| 138 | Breast | FGFR1 amp | 1 | YES | NO |
| 139 | Lung | BRAF amp, CCNE1 amp, EGFR T790M, EGFR E19 del, EGFR amp, TP53 C275S | 6 | YES | NO |
| 140 | Lung | ARID1A Q708*, KRAS G13D, TP53 S94* | 3 | YES | NO |
| 141 | Lung | PTEN K125E | 1 | YES | NO |
| 142 | Head and neck | TP53 V272M | 1 | NO | YES |
| 143 | Lung | FGFR2 A315T | 1 | YES | NO |
| 144 | Gastrointestinal | CDKN2A R80*, CTNNB1 G34V | 2 | YES | NO |
| 145 | Gastrointestinal | CTNNB1 S33F, KRAS A146T, PIK3CA E545K | 3 | YES | NO |
| 146 | Gastrointestinal | CCNE1 amp, CDK6 amp, EGFR amp, MYC amp, PIK3CA amp | 5 | YES | NO |
| 147 | Brain - CNS | TP53 S215R | 1 | NO | YES |
| 148 | Skin - Melanoma | TP53 I254T | 1 | NO | YES |
| 149 | Gastrointestinal | CTNNB1 H36P, RAF1 amp, TP53 H179R | 3 | YES | NO |
| 150 | Skin - Melanoma | IDH1 R132C, NRAS Q61R | 2 | YES | NO |
| 151 | Gastrointestinal | TP53 H193R | 1 | NO | YES |
| 152 | Lung | ALK ALK EML4 fusion, TP53 Y220C | 2 | YES | NO |
| 153 | Lung | CCNE1 amp, TP53 P278L | 2 | NO | YES |
| 154 | Lung | KIT amp, PDGFRA amp, PIK3CA amp, PIK3CA E542K, PIK3CA H1047L | 5 | YES | NO |
| 155 | Gastrointestinal | APC R876*, FBXW7 R479Q, KRAS K117N, PTEN R173C | 4 | YES | NO |
| 156 | Gastrointestinal | APC L769* | 1 | YES | NO |
| 157 | Gastrointestinal | KRAS G12V, MYC amp | 2 | YES | NO |
| 158 | Lung | CDKN2A D108Y, EZH2 Y646N, TP53 Y205C, TP53 R273L, TP53 R280K, TP53 G154V, TP53 K132Q | 7 | YES | NO |
| 159 | Gastrointestinal | ERBB2 amp, MYC amp, TP53 R273C | 3 | YES | NO |
| 160 | Genitourinary | AR amp, BRAF amp, CDK6 amp, EGFR amp, PTEN S170I | 5 | YES | NO |
| 161 | Lung | ARID1A S744*, EGFR S768I, EGFR G719C, MYC amp | 4 | YES | NO |
| 162 | Gastrointestinal | ESR1 L536P, PIK3CA H1047R | 2 | YES | NO |
| 163 | Lung | TP53 G154V | 1 | NO | YES |
| 164 | Gastrointestinal | KRAS G12V | 1 | YES | NO |
| 165 | Other | JAK2 V617F | 1 | YES | NO |
| 166 | Gastrointestinal | TP53 F270L | 1 | NO | YES |
| 167 | Breast | AKT1 E17K, TP53 M237I | 2 | YES | NO |
| 168 | Gastrointestinal | KRAS G12V, TP53 V272L | 2 | YES | NO |
| 169 | Head and neck | PIK3CA amp, TP53 R273C | 2 | YES | NO |
| 170 | Breast | TP53 V216L, TP53 H179Q, TP53 T211I | 3 | NO | YES |
| 171 | Lung | EGFR T790M, EGFR E19 del, EGFR amp, TP53 I162F | 4 | YES | NO |
| 172 | Other | PTEN R130G | 1 | YES | NO |
| 173 | Gastrointestinal | TP53 S241F | 1 | NO | YES |
| 174 | Gastrointestinal | ARID1A Q268* | 1 | NO | YES |
| 175 | Gastrointestinal | CDK4 amp, CDKN2A W15*, ERBB2 amp, KRAS G12R, KRAS amp, TP53 R282W | 6 | YES | NO |
| 176 | Gastrointestinal | KRAS G12D, TP53 R175H | 2 | YES | NO |
| 177 | Gastrointestinal | CCNE1 amp, FGFR2 amp, TP53 R175H | 3 | YES | NO |
| 178 | Lung | JAK2 V617F, NRAS T50I | 2 | YES | NO |
| 179 | Lung | BRAF G466V, CDK6 amp, MYC amp, NF1 S402*, NRAS G12D, PIK3CA amp, TP53 I255F | 7 | YES | NO |
| 180 | Brain - CNS | TP53 Y205N | 1 | NO | YES |
| 181 | Brain - CNS | TP53 R280I | 1 | NO | YES |
| 182 | Gynecologic | TP53 R342*, TP53 C275Y | 2 | NO | YES |
| 183 | Gastrointestinal | KRAS G12V | 1 | YES | NO |
| 184 | Genitourinary | AR amp, BRAF K601E | 2 | YES | NO |
| 185 | Gastrointestinal | GNAS R201H | 1 | YES | NO |
| 186 | Gastrointestinal | RAF1 R143W | 1 | YES | NO |
| 187 | Lung | CDKN2A R80*, HNF1A R272C, TP53 L111P | 3 | YES | NO |
| 188 | Gastrointestinal | KRAS G12V, NF1 K1444E, PIK3CA E545K, TP53 R306* | 4 | YES | NO |
| 189 | Lung | BRAF amp, CDK6 amp, KRAS G12V | 3 | YES | NO |
| 190 | Gastrointestinal | TP53 G245S | 1 | NO | YES |
| 191 | Lung | KRAS G12C | 1 | YES | NO |
| 192 | Lung | EGFR amp, EGFR E19 del, FGFR1 amp, KRAS Q22K, KRAS G12D, NRAS T58I, TP53 S241F | 7 | YES | NO |
| 193 | Lung | EGFR L861Q, EGFR amp, PIK3CA E542K, TP53 C238F, TP53 F113V | 5 | YES | NO |
| 194 | Skin - Melanoma | TP53 P278S | 1 | NO | YES |
| 195 | Lung | PIK3CA E545K, TP53 V157F | 2 | YES | NO |
| 196 | Gastrointestinal | APC Y158*, BRAF amp, CCNE1 amp, CDK6 amp, EGFR amp, KRAS amp, MET amp, MYC amp, PIK3CA amp, TP53 V197E | 10 | YES | NO |
| 197 | Gastrointestinal | PIK3CA E545K, TP53 R175H | 2 | YES | NO |
| 198 | Gastrointestinal | APC S1356*, APC E1155*, KRAS G12V, TP53 G105S, TP53 R248Q, TP53 R175H | 6 | YES | NO |
| 199 | Gastrointestinal | BRAF amp, KRAS G12D | 2 | YES | NO |
| 200 | Skin - Melanoma | APC R24* | 1 | YES | NO |
| 201 | Gastrointestinal | RIT1 M90I, TP53 M246V | 2 | YES | NO |
| 202 | Lung | PIK3CA amp, TP53 C176Y, TP53 R181C | 3 | YES | NO |
| 203 | Lung | EGFR L858R, EGFR T790M, EGFR amp, MET amp | 4 | YES | NO |
| 204 | Lung | EGFR E19 del | 1 | YES | NO |
| 205 | Breast | PTEN C136R | 1 | YES | NO |
| 206 | Lung | TP53 G154V | 1 | NO | YES |
| 207 | Lung | KRAS G12C, TP53 R158L | 2 | YES | NO |
| 208 | Lung | TP53 V216L | 1 | NO | YES |
| 209 | Breast | ERBB2 amp, PIK3CA E81K, PIK3CA amp | 3 | YES | NO |
| 210 | Head and neck | TP53 E294* | 1 | NO | YES |
| 211 | Lung | IDH2 R140Q, MET amp, TP53 Y126C, TP53 R175H, TP53 R283P | 5 | YES | NO |
| 212 | Head and neck | TP53 P190S | 1 | NO | YES |
| 213 | Gastrointestinal | CTNNB1 S45P, TP53 H214R | 2 | YES | NO |
| 214 | Gastrointestinal | TP53 H178D | 1 | NO | YES |
| 215 | Gastrointestinal | KRAS G12D | 1 | YES | NO |
| 216 | Lung | KRAS G12A, TP53 P151S, TP53 P27L, TP53 R273C | 4 | YES | NO |
| 217 | Brain - CNS | IDH1 R132H | 1 | YES | NO |
| 218 | Gastrointestinal | APC R213*, TP53 R158H | 2 | YES | NO |
| 219 | Lung | TP53 G245R | 1 | NO | YES |
| 220 | Head and neck | BRAF V600E, TP53 Y234C, TP53 R280G | 3 | YES | NO |
| 221 | Gastrointestinal | IDH1 R132C, MYC amp, SMAD4 R361H, TP53 C238R | 4 | YES | NO |
| 222 | Other | BRAF amp, PIK3CA amp, RAF1 amp, RB1 C712* | 4 | YES | NO |
| 223 | Gastrointestinal | CTNNB1 S45F | 1 | YES | NO |
| 224 | Gastrointestinal | AKT1 E17K | 1 | YES | NO |
| 225 | Gastrointestinal | TP53 K139N | 1 | NO | YES |
| 226 | Gastrointestinal | APC E1306*, APC G471*, BRCA2 S1064*, ERBB2 amp, KRAS amp, TP53 G266V | 6 | YES | NO |
| 227 | Head and neck | ERBB2 amp, TP53 I332F, TP53 C176S | 3 | YES | NO |
| 228 | Gastrointestinal | KRAS amp, TP53 R306* | 2 | YES | NO |
| 229 | Gastrointestinal | PIK3CA H1047L, TP53 R280G, TP53 H193R | 3 | YES | NO |
| 230 | Genitourinary | AR amp, EGFR amp, TP53 R306* | 3 | YES | NO |
| 231 | Gastrointestinal | KRAS G12D | 1 | YES | NO |
| 232 | Gastrointestinal | KRAS G12D | 1 | YES | NO |
| 233 | Gastrointestinal | TP53 C176F | 1 | NO | YES |
| 234 | Gastrointestinal | GNAS R201H | 1 | YES | NO |
| 235 | Lung | ROS1 ROS1 CD74 fusion, SMAD4 Q183*, TP53 Q331*, TP53 Q192*, TP53 S241C, TP53 S215I, TP53 E286K | 7 | YES | NO |
| 236 | Gastrointestinal | ARID1A E1668*, CTNNB1 S37F | 2 | YES | NO |
| 237 | Gastrointestinal | ATM R3008C | 1 | YES | NO |
| 238 | Gastrointestinal | TP53 Y220C | 1 | NO | YES |
| 239 | Lung | ALK ALK EML4 fusion, TP53 R273L | 2 | YES | NO |
| 240 | Genitourinary | BRCA2 S401*, CCNE1 amp, CDK6 amp, JAK2 V617F, KRAS amp, PIK3CA amp, RAF1 amp, TP53 I195S, TP53 R248Q, TP53 R213*, TP53 S183* | 11 | YES | NO |
| 241 | Lung | EGFR E19 del, EGFR T790M, TP53 L130P | 3 | YES | NO |
| 242 | Gastrointestinal | NRAS Q61R | 1 | YES | NO |
| 243 | Head and neck | PIK3CA E545K, PIK3CA amp, TP53 V216M, TP53 R273L, TP53 R181P | 5 | YES | NO |
| 244 | Brain - CNS | TP53 V143M | 1 | NO | YES |
| 245 | Gastrointestinal | APC L1564*, KRAS G13D, PIK3CA E545K | 3 | YES | NO |
| 246 | Lung | TP53 L145P, TP53 H179Y, TP53 R282W | 3 | NO | YES |
| 247 | Lung | EGFR E19 del, TP53 F270C | 2 | YES | NO |
| 248 | Gastrointestinal | KRAS G12V | 1 | YES | NO |
| 249 | Breast | IDH2 R140Q | 1 | YES | NO |
| 250 | Gastrointestinal | FGFR2 amp, TP53 R337C | 2 | YES | NO |
| 251 | Gastrointestinal | TP53 S127F | 1 | NO | YES |
| 252 | Head and neck | CDKN2A R80*, NOTCH1 R448*, TP53 Y234* | 3 | YES | NO |
| 253 | Skin - Melanoma | BRAF amp, EGFR amp | 2 | YES | NO |
| 254 | Genitourinary | PIK3CA H1047R, SMAD4 R361H, TP53 R196* | 3 | YES | NO |
| 255 | Gastrointestinal | APC E1397*, APC K534*, AR amp, EGFR amp, TP53 G245S | 5 | YES | NO |
| 256 | Gastrointestinal | KRAS amp, TP53 E286* | 2 | YES | NO |
| 257 | Gastrointestinal | CCNE1 amp, CDK4 amp, KRAS amp, TP53 R249S, TP53 R196Q | 5 | YES | NO |
| 258 | Skin - Melanoma | JAK2 V617F | 1 | YES | NO |
| 259 | Lung | KRAS G12C | 1 | YES | NO |
| 260 | Lung | CCNE1 amp, CTNNB1 S45F, MYC amp | 3 | YES | NO |
| 261 | Skin - Melanoma | BRAF V600E, MET amp | 2 | YES | NO |
| 262 | Gastrointestinal | TP53 Q100R | 1 | NO | YES |
| 263 | Head and neck | ATM R3008C, BRCA2 S884*, SMAD4 D351H, TP53 R175H, TP53 A161T, TP53 H168R | 6 | YES | NO |
| 264 | Lung | TP53 E62*, TP53 R175H | 2 | NO | YES |
| 265 | Gastrointestinal | KRAS G12D, PIK3CA H1047R, TP53 Y220C, TP53 R282W, TP53 C238F | 5 | YES | NO |
| 266 | Lung | PIK3CA amp, TP53 G266V | 2 | YES | NO |
| 267 | Gastrointestinal | TP53 R342* | 1 | NO | YES |
| 268 | Head and neck | TP53 Y220C | 1 | NO | YES |
| 269 | Gastrointestinal | FGFR1 amp, KRAS Q61H, PIK3CA E453K, TP53 S241F | 4 | YES | NO |
| 270 | Head and neck | KRAS amp, MYC amp, TP53 R248W, TP53 R273H | 4 | YES | NO |
| 271 | Head and neck | BRAF amp, CDK6 amp, EGFR amp, MET amp, PIK3CA E545K, TP53 C176W, TP53 R248W | 7 | YES | NO |
| 272 | Breast | BRAF amp, CDK4 amp, TP53 R213Q | 3 | YES | NO |
| 273 | Head and neck | TP53 S127F, TP53 Y220C, TP53 V173M | 3 | NO | YES |
| 274 | Head and neck | TP53 Q104* | 1 | NO | YES |
| 275 | Gastrointestinal | EGFR G724S | 1 | YES | NO |
| 276 | Gastrointestinal | TP53 G245S | 1 | NO | YES |
| 277 | Breast | FGFR1 amp, TP53 V272L, TP53 F270L | 3 | YES | NO |
| 278 | Gastrointestinal | KRAS G12D, KRAS amp, TP53 N239T | 3 | YES | NO |
| 279 | Gastrointestinal | KRAS G12V, TP53 C275F | 2 | YES | NO |
| 280 | Head and neck | TP53 R267W, TP53 W146* | 2 | NO | YES |
| 281 | Mesothelioma | TP53 G244S | 1 | NO | YES |
| 282 | Head and neck | CDKN2A D84Y, NFE2L2 W24C, PTEN Q298*, TP53 Q144* | 4 | YES | NO |
| 283 | Gastrointestinal | APC R213*, KRAS G12V, TP53 G245V | 3 | YES | NO |
| 284 | Head and neck | BRCA2 S1001*, NFE2L2 D77G, TP53 P278S, TP53 Y236*, TP53 H193D | 5 | YES | NO |
| 285 | Gastrointestinal | APC G682*, RET RET TRIM24 fusion, TP53 M237T | 3 | YES | NO |
| 286 | Lung | EGFR E709A, EGFR G719A, EGFR amp, FGFR1 amp, KIT amp, MYC amp, PDGFRA amp, TP53 S127F | 8 | YES | NO |
| 287 | Lung | BRAF amp, CTNNB1 S37F, FBXW7 Y509*, NFE2L2 E79Q, PIK3CA amp, PTEN C136R | 6 | YES | NO |
| 288 | Gastrointestinal | GNAS R201C, KRAS G12D, KRAS amp, MET amp, MYC amp, TP53 G105V | 6 | YES | NO |
| 289 | Gastrointestinal | TP53 R280I | 1 | NO | YES |
| 290 | Gastrointestinal | CTNNB1 T41A, NFE2L2 E82G, TP53 R248G | 3 | YES | NO |
| 291 | Lung | TP53 V157F | 1 | NO | YES |
| 292 | Lung | MET E14 skip, TP53 S241F | 2 | YES | NO |
| 293 | Other | CDKN2A R58*, KRAS G12D, TP53 G245D, TP53 H168P | 4 | YES | NO |
| 294 | Gastrointestinal | APC R216*, BRAF amp, EGFR amp, FGFR1 amp, MYC amp, TP53 R273C | 6 | YES | NO |
| 295 | Lung | KRAS G12C, TP53 R273C | 2 | YES | NO |
| 296 | Lung | BRAF amp, BRCA1 R1751*, CDK6 amp, EGFR amp, MET amp, PIK3CA amp, TP53 V216M | 7 | YES | NO |
| 297 | Lung | KRAS G12C, TP53 R158L | 2 | YES | NO |
| 298 | Lung | ERBB2 amp, KRAS G12C, PIK3CA E542K, TP53 G244S | 4 | YES | NO |
| 299 | Lung | ALK ALK EML4 fusion | 1 | YES | NO |
| 300 | Head and neck | NFE2L2 E79Q, PIK3CA E542K, TP53 Q104*, TP53 R280S | 4 | YES | NO |
| 301 | Other | TP53 R282W | 1 | NO | YES |
| 302 | Lung | EGFR L858R, KRAS amp, MYC amp, RB1 K791*, TP53 R283P, TP53 P151S | 7 | YES | NO |
| 303 | Lung | IDH1 R132S, PDGFRA V859M | 2 | YES | NO |
| 304 | Lung | EGFR E19 del | 1 | YES | NO |
| 305 | Lung | ALK ALK EML4 fusion | 1 | YES | NO |
| 306 | Gastrointestinal | KRAS G12S, TP53 R248Q | 2 | YES | NO |
| 307 | Breast | TP53 R175H | 1 | NO | YES |
| 308 | Lung | GNAS R201H, TP53 G245D, TP53 V272M, TP53 R175H | 4 | YES | NO |
| 309 | Breast | FGFR1 amp, MYC amp, PIK3CA H1047Q, PIK3CA E545K, RAF1 amp | 5 | YES | NO |
| 310 | Lung | KRAS G12C, TP53 C176* | 2 | YES | NO |
| 311 | Gastrointestinal | APC R554*, APC R232* | 2 | YES | NO |
| 312 | Gastrointestinal | ERBB2 amp, KRAS amp, PIK3CA amp, PIK3CA E545K, TP53 E285K | 5 | YES | NO |
| 313 | Gastrointestinal | JAK2 V617F | 1 | YES | NO |
| 314 | Breast | IDH1 R132G, JAK2 V617F | 2 | YES | NO |
| 315 | Head and neck | CCNE1 amp, FGFR1 amp, KIT amp, PDGFRA amp | 4 | YES | NO |
| 316 | Gastrointestinal | KRAS Q61H, PIK3CA E545K | 2 | YES | NO |
| 317 | Lung | TP53 P278A | 1 | NO | YES |
| 318 | Gastrointestinal | KRAS G12C, KRAS amp, MYC amp, TP53 R248Q, TP53 R280G | 5 | YES | NO |
| 319 | Lung | KRAS V14I | 1 | YES | NO |
| 320 | Lung | JAK2 V617F | 1 | YES | NO |
